# Supplementary material for: LEADeR role of miR-205 host gene as long noncoding RNA in prostate basal cell differentiation
Source: PubMed Central journal article supplement (PMC6338800; doi:10.1038/s41467-018-08153-2), 2019-01-18
Supplement: 41467_2018_8153_MOESM1_ESM.pdf [file 41467_2018_8153_MOESM1_ESM.pdf]

## SUPPLEMENTARY INFORMATION

### ***LEADeR* role of *miR-205* host gene as long non-coding RNA in prostate basal cell differentiation**

Profumo, Forte, Percio, Rotundo et al.

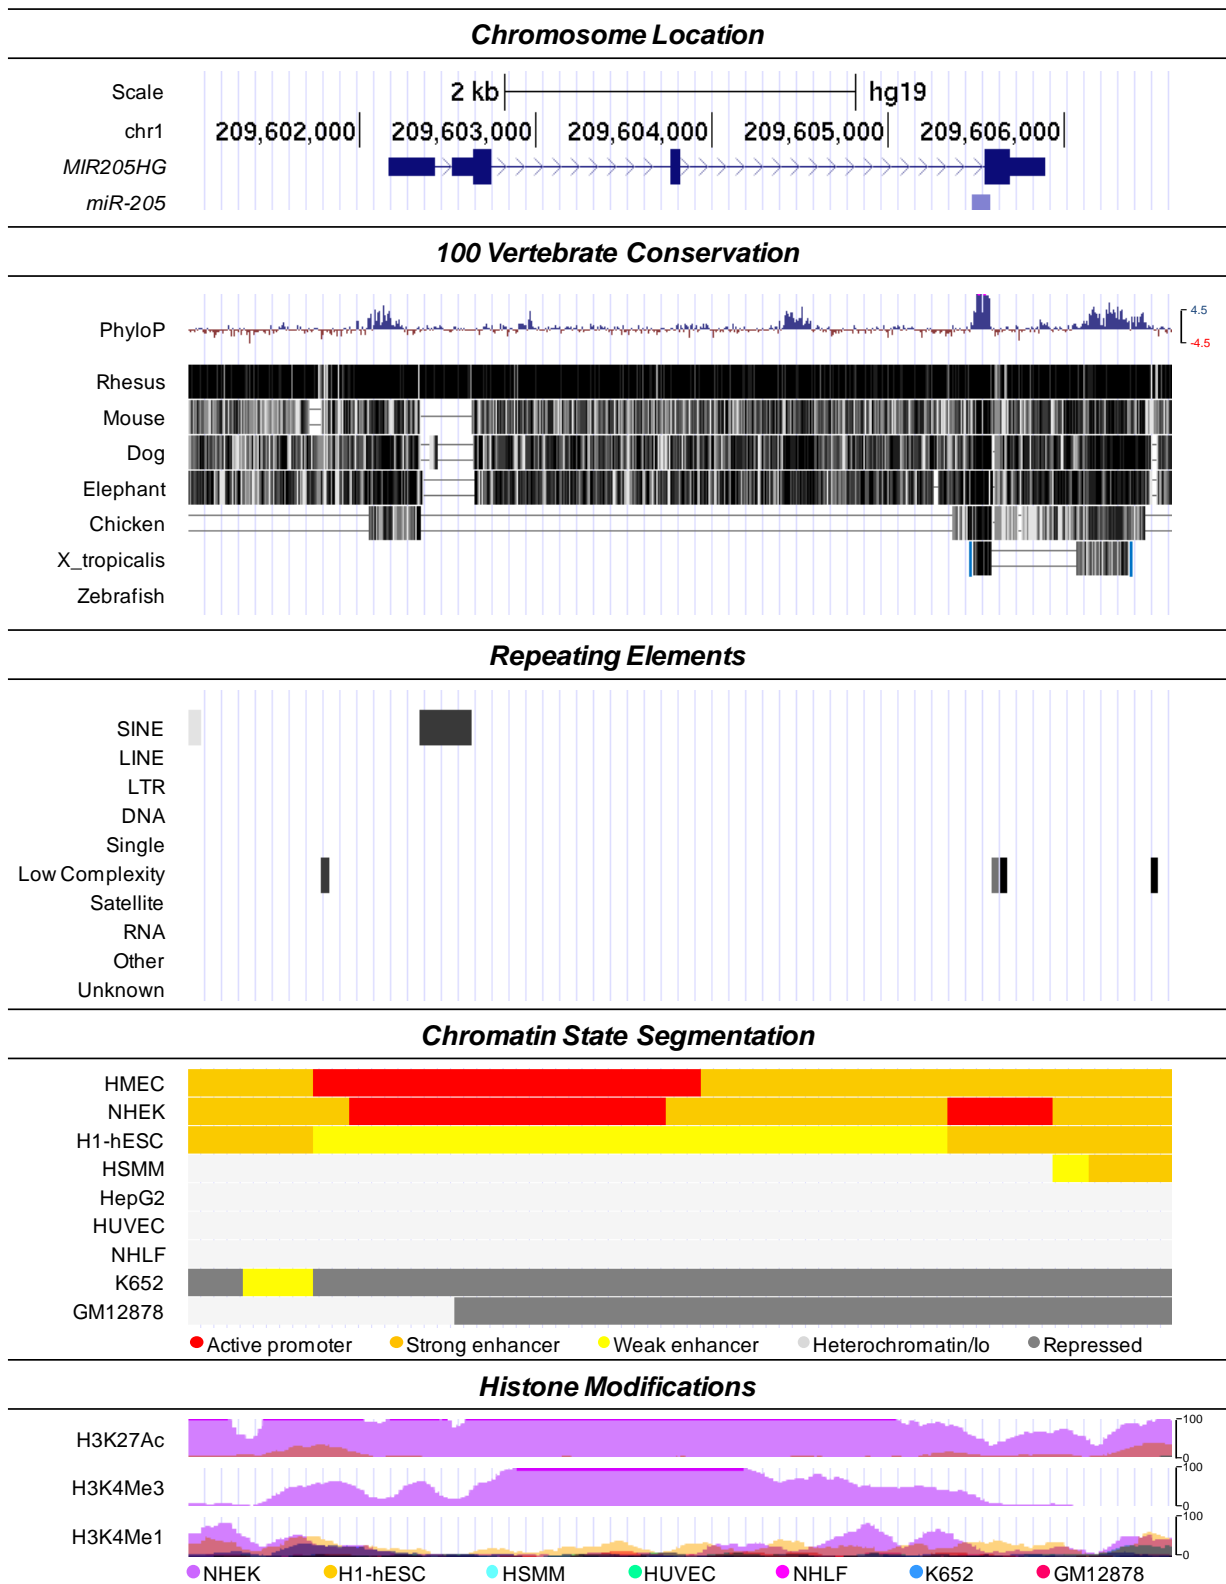

**Supplementary Figure 1. *LEADR/MIR205HG* locus.** *MIR205HG* locus as from UCSC Genome Browser (Human GRCh37/hg19 Assembly). From top to bottom, *i*) chromosome location of *LEADR/MIR205HG* NCBI RefSeq and *miR-205* precursor, *ii*) sequence conservation across 100 vertebrate species (shown as PhyloP and Multiz Alignments), *iii*) repeating elements (with evident SINE/*Alu* element spanning *LEADR* exon-1 and 2), *iv*) chromatin state segmentation and *v*) histone modifications in ENCODE cell lines. Color codes for chromatin state segmentation and for

ENCODE cell lines analyzed for histone modifications (namely HMEC, Human Mammary Epithelial Cells; NHEK, Normal Human Epidermal Keratinocytes; H1-hESC, Human Embryonic Stem Cells; K562, chronic myeloid leukemia cell line; GM12878, lymphoblastoid cell line; HSMM, Human Skeletal Muscle Myoblasts; HUVEC, Human Umbilical Vein Endothelial Cells; NHLF, Normal Human Lung Fibroblasts) are reported below each panel. Tracks for histone modifications are shown in packed form. y-scale shown on the right side, when applicable.

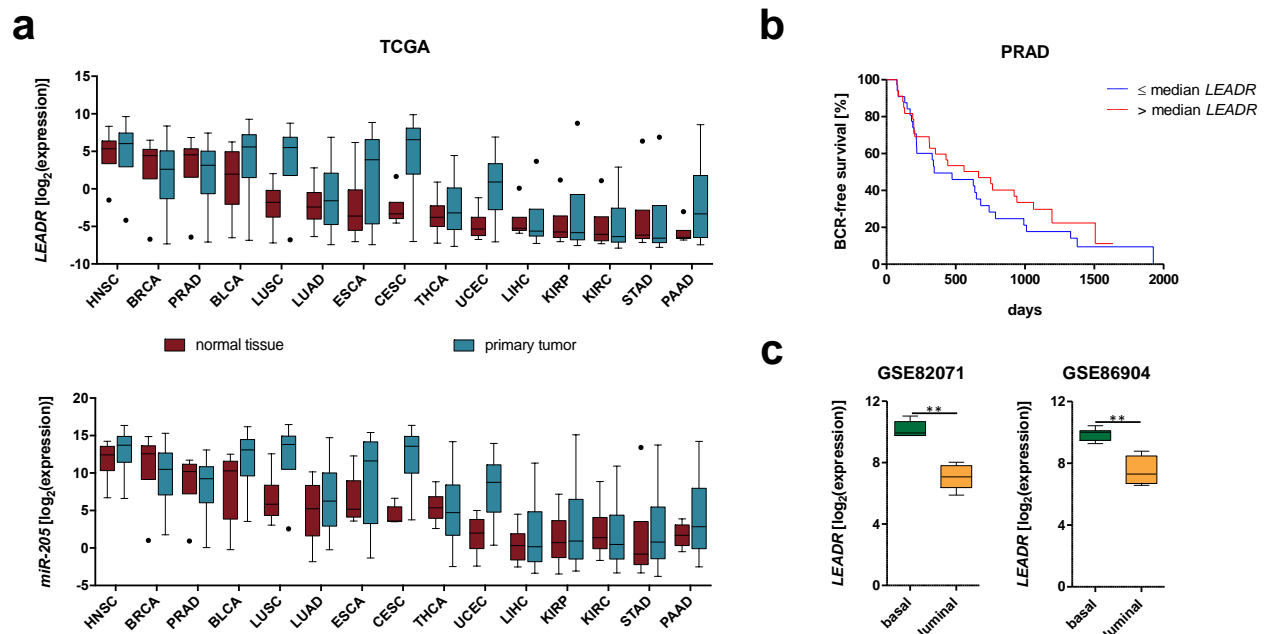

**Supplementary Figure 2. *LEADR/MIR205HG* expression in human tumors and prostate cells.**

(a) Tukey's box plots of *LEADR/MIR205HG* (top) and *miR-205* (bottom) expression levels in different human tumors compared to healthy counterparts, as from TCGA. Only cancer types with at least 100 tumor and 3 normal samples with available *MIR205HG* and *miR-205* expression data were considered for the analysis. [BLCA (Bladder Urothelial Carcinoma), BRCA (Breast Invasive Carcinoma), CESC (Cervical Squamous Cell Carcinoma and Endocervical Adenocarcinoma), ESCA (Esophageal Carcinoma), HNSC (Head and Neck Squamous Cell Carcinoma), KIRC (Kidney Renal Clear Cell Carcinoma), KIRP (Kidney Renal Papillary Cell Carcinoma), LIHC (Liver Hepatocellular Carcinoma), LUAD (Lung Adenocarcinoma), LUSC (Lung Squamous Cell Carcinoma), PAAD (Pancreatic Adenocarcinoma), PRAD (Prostate Adenocarcinoma), STAD (Stomach Adenocarcinoma), THCA (Thyroid Carcinoma), UCEC (Uterine Corpus Endometrial Carcinoma)]. (b) Kaplan-Meier curve reporting biochemical relapse (BCR)-free survival of patients with *LEADR* expression lower (blue) or higher (red) than the median value from TCGA-PRAD. Neither log-rank nor Wilcoxon tests showed significance differences in relapse occurrence. (c) Tukey's box plots of *LEADR/MIR205HG* expression in basal/luminal cell subpopulations from two publicly available gene expression datasets of cells isolated from human normal prostate. \*\*  $p < 0.01$  (Student's t-test). Source data are provided as a Source Data file, together with n of all experiments.

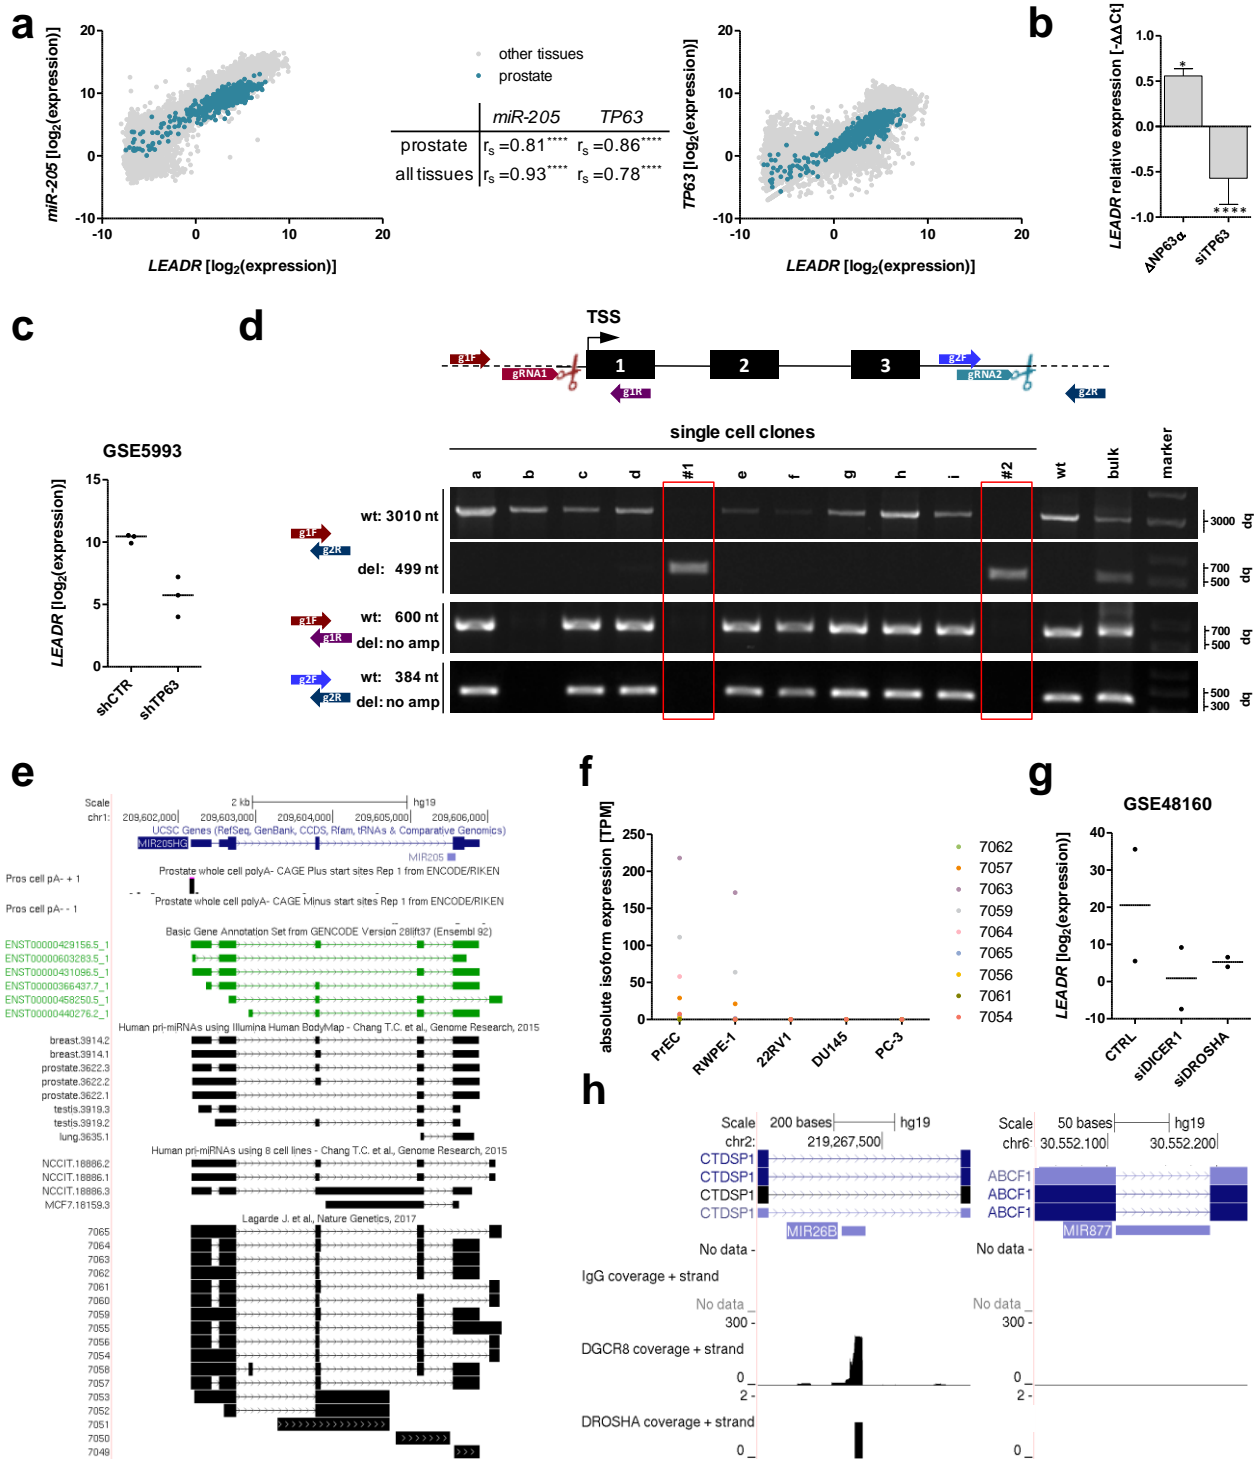

**Supplementary Figure 3. *LEADR* expression is regulated by p63 and *miR-205* biogenesis is Drosha- and Dicer-dependent.** (a) Scatter plot of *LEADR* and *miR-205* (left), or *TP63* (right) expression in TCGA. Spearman correlation coefficients ( $r_s$ ) and  $p$ -values are reported in the embedded table. (b) qRT-PCR showing modulation of *LEADR* expression levels upon over-expression ( $\Delta Np63\alpha$ ) or silencing (siTP63) of p63 in RWPE-1 cells, as compared to relative controls (EV or siCTR, respectively). Mean + s.d. ( $n=2$  and 8, respectively) plotted. (c) Dot plot of *LEADR/MIR205HG* reduction upon p63 silencing by shRNA in cervical carcinoma cells (GSE5993). Each sample shown. Line at median. (d) Genotyping of CRISPRed RWPE-1 cells. Location of gRNAs used for genomic deletion of *LEADR* and of primers used for genotyping PCR is shown. Both bulk population and single cell clones (from a to i) are reported. Clones

characterized by homozygous *LEADR* deletion are indicated as clone #1 and clone #2. (e) *LEADR/MIR205HG* transcript structures as from: RefSeq; Genecode v28lift37 Basic; genome-wide high-resolution remapping of pri-miRNAs performed by Chang T.C. *et al.*, Genome Research, 2015 (SRP057660); targeted RNA capture with third-generation long-read sequencing technology performed by Lagarde J. *et al.*, Nature Genetics, 2017 (GSE93848). Results of CAGE experiments on prostate cells from ENCODE/RIKEN showing *LEADR* putative TSS on the positive strand are reported. (f) Absolute expression of *LEADR* transcript isoforms in normal (PrEC and RWPE-1) and tumor cell lines (22RV1, DU145 and PC-3) as from RNA-Seq data (GSE75035 and GSE25183). (g) Dot plot of *miR-205* expression upon silencing of *DROSHA* or *DICER1*. Each sample shown. Line at median. (h) RNA-Seq peaks of *DROSHA* and *DGCR8* as from CLIP experiments (GSE61979) shown for *miR-26b* (left) and *miR-877* (right). IgG peaks reported for comparison. \* $p < 0.05$ ; \*\*\*\* $p < 0.0001$  (Student's t-test). Source data are provided as a Source Data file, together with n of all experiments.

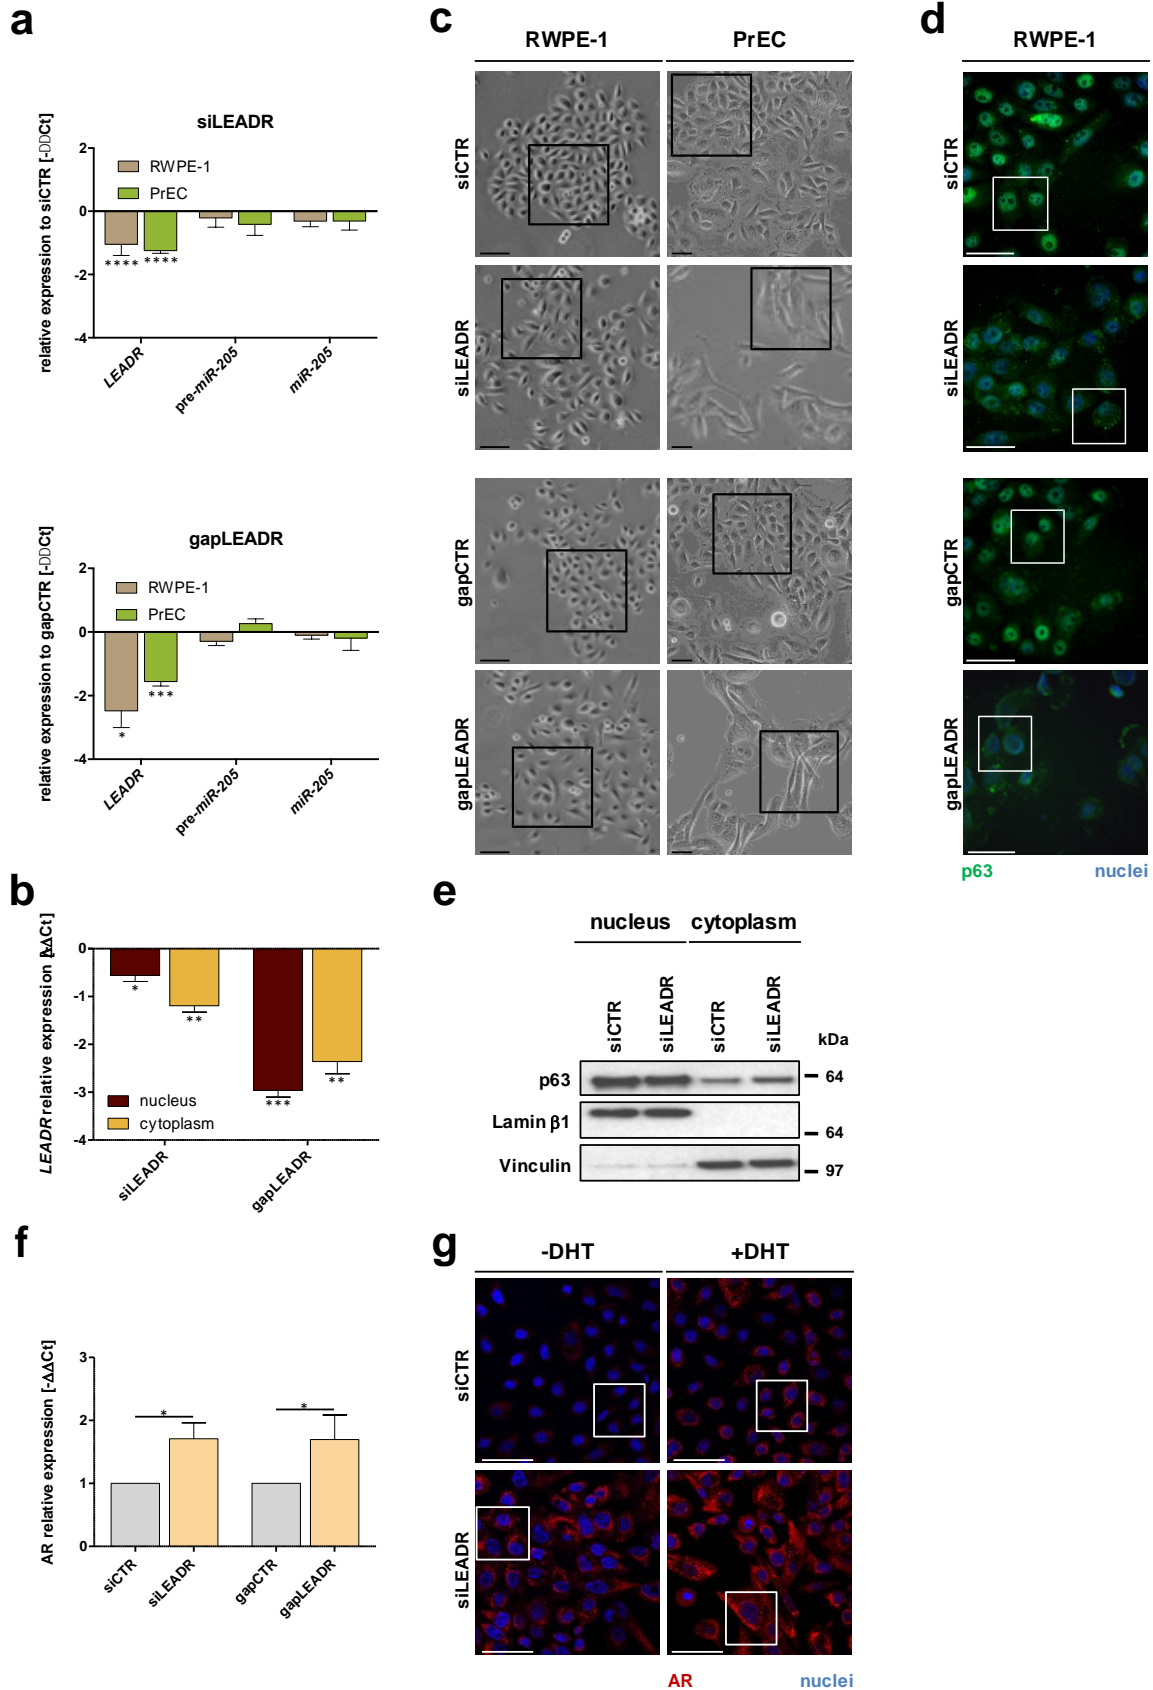

**Supplementary Figure 4. *LEADR* regulates basal-luminal differentiation.** (a) qRT-PCR showing *LEADR*, precursor and mature *miR-205* expression levels in immortalized (RWPE-1) or primary (PrEC) prostate basal cells upon *LEADR* silencing by si*LEADR* (top) or gap*LEADR* (bottom). Mean + s.d. plotted. (b) qRT-PCR showing the efficacy of si*LEADR* or gap*LEADR* in

abrogating the nuclear and cytoplasmic *LEADR* pools in RWPE-1 cells. Mean + s.d. (n=3 qRT-PCR measurements for each experimental condition) plotted, as compared to the specific control oligomers. (c) Full-size bright-field images showing morphological changes occurring in RWPE-1 (*left*) and PrEC (*right*) cells (day 3) upon *LEADR* silencing by siLEADR (*top*) or gapLEADR (*bottom*). Scale bar, 50  $\mu\text{m}$ . Magnifications shown in main Fig. 5a. (d) Full-size immunofluorescence images showing cytoplasmic re-localization of p63 (green) upon *LEADR* silencing in RWPE-1 cells by siLEADR (*top*) or gapLEADR (*bottom*). Nuclei counterstained with DAPI (blue). Scale bar, 50  $\mu\text{m}$ . Magnifications shown in main Fig. 5d. (e) Western blot showing cytoplasmic re-localization of p63 upon *LEADR* silencing in RWPE-1 cells by siLEADR. Lamin- $\beta$ 1 and Vinculin used as nuclear and cytoplasmic reference, respectively. (f) qRT-PCR showing changes in androgen receptor (AR) expression in PrEC cells upon *LEADR* silencing by siLEADR or gapLEADR. Mean + s.d. (n=3) plotted. (g) Full-size immunofluorescence images showing AR (red) expression in PrEC cells upon *LEADR* silencing by siLEADR, in the presence or absence of simultaneous stimulation with DHT. Nuclei counterstained with DAPI (blue). Scale bar, 50  $\mu\text{m}$ . Magnifications shown in main Fig. 5f. \* $p < 0.05$ ; \*\* $p < 0.01$ ; \*\*\* $p < 0.001$ ; \*\*\*\* $p < 0.0001$  (Student's t-test). Source data are provided as a Source Data file, together with n of all experiments.



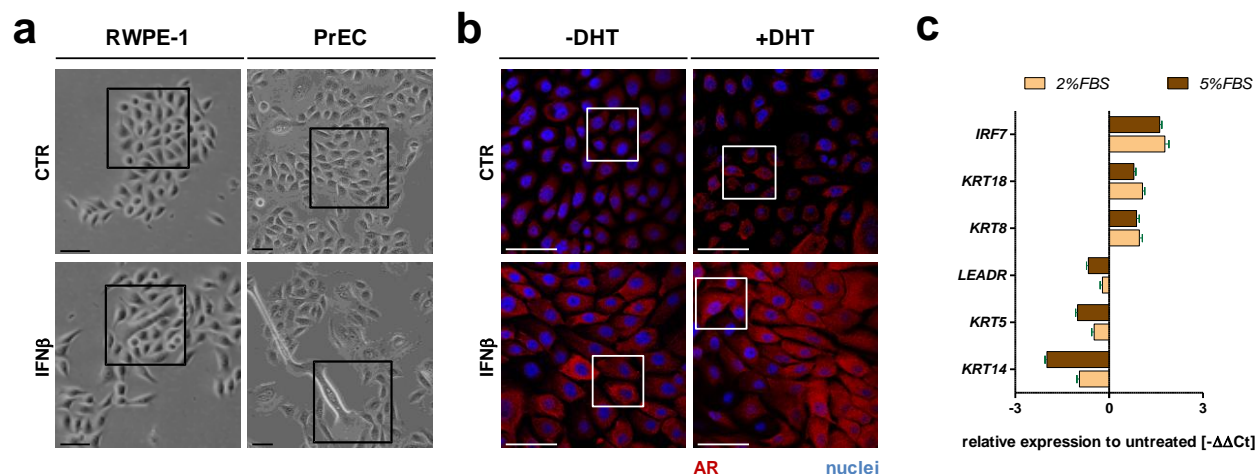

**Supplementary Figure 5. Interferon induces basal-luminal differentiation.** (a) Full-size bright-field images showing morphological changes occurring in RWPE-1 and PrEC cells (day 3) upon interferon- $\beta$ 1 treatment. Scale bar, 50  $\mu$ m. Magnifications shown in main Fig. 6e. (b) Full-size immunofluorescence images showing AR (red) expression in PrEC cells upon interferon- $\beta$ 1 treatment in the presence or absence of simultaneous stimulation with DHT. Nuclei counterstained with DAPI (blue). Scale bar, 50  $\mu$ m. Magnifications shown in main Fig. 6h. (c) qRT-PCR showing changes in basal/luminal cytokeratins, *IRF7*, and *LEADR* in PrEC cells upon serum stimulation. Mean + s.d. (n=3 qRT-PCR measurements for each experimental condition) plotted. Source data are provided as a Source Data file.

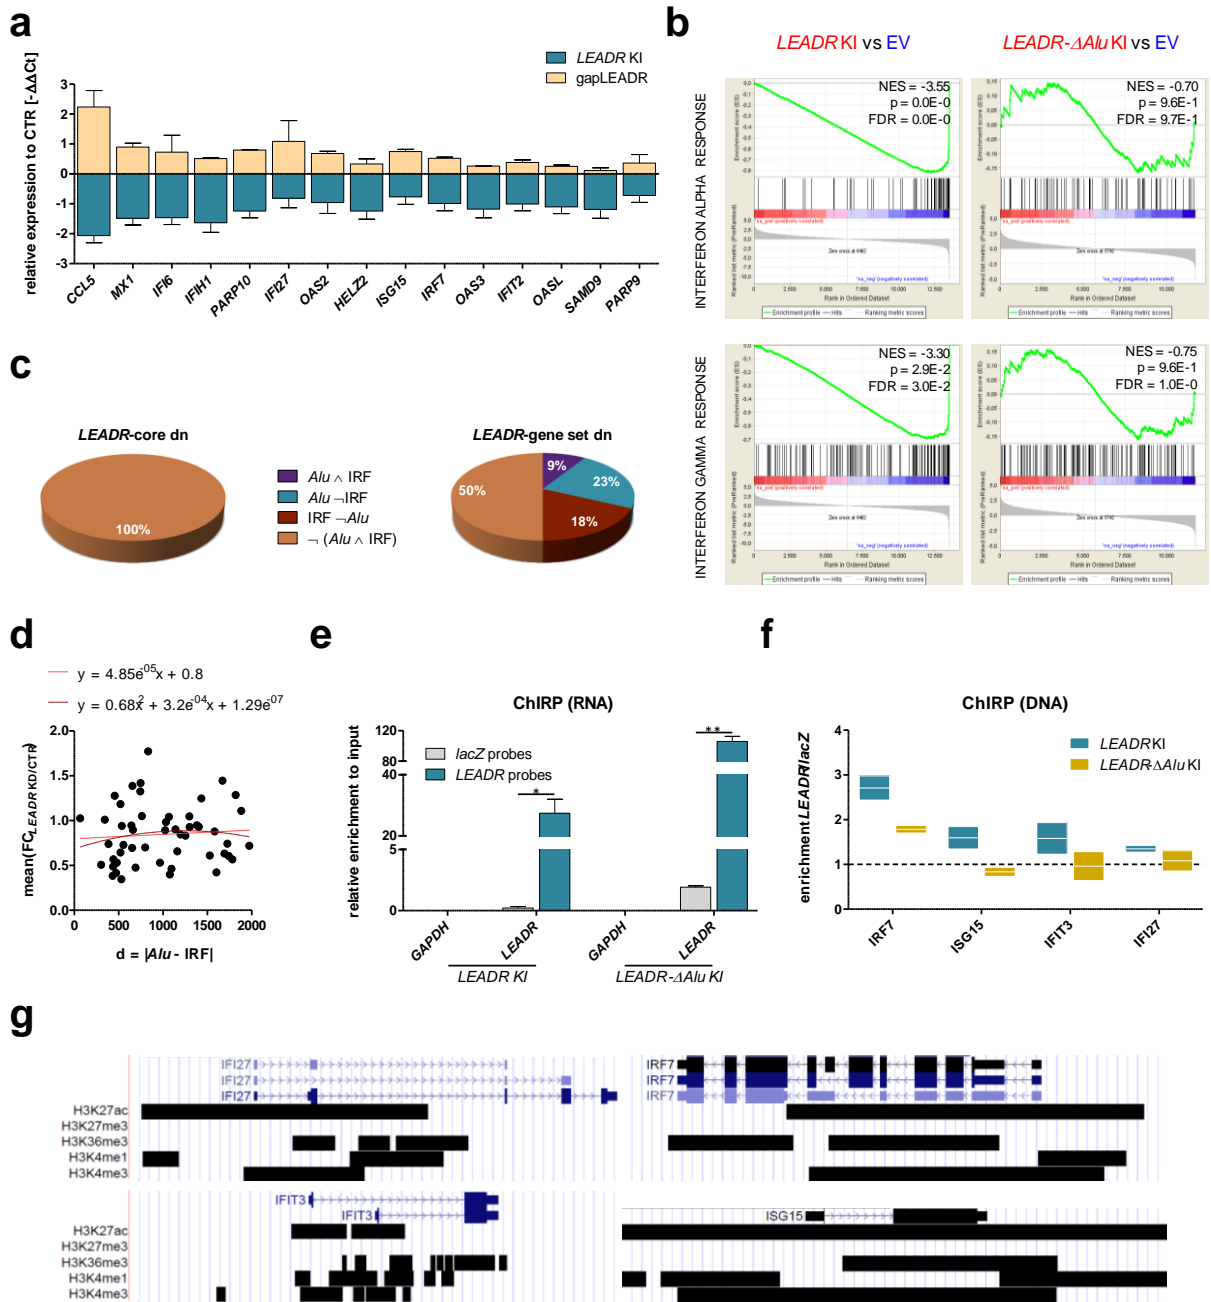

**Supplementary Figure 6. Analysis of *LEADR* target genes.** (a) qRT-PCR analysis showing the expression of genes randomly selected from ‘*LEADR*-core up’ gene set upon *LEADR* silencing in RWPE-1 cells (gap*LEADR*) or overexpression (RefSeq) in DU145 cells. Mean + s.d. (n=2 and 3, respectively) plotted. (b) GSEA of interferon-related gene sets in DU145 knocked-in (KI) for the wild type (*LEADR*) or the *Alu*-deleted (*LEADR*-Δ*Alu*) form of *LEADR* RefSeq transcript. NES, p, and FDR values are indicated in each plot. (c) Pie charts of the frequency of *Alu*/IRF sites in ‘*LEADR*-core dn’ and ‘*LEADR*-gene set dn’ signatures. (d) Scatter plot showing lack of linear or polynomial correlation between intensity of regulation by *LEADR* (plotted as mean value of FCs of the two *LEADR* silencing experiments) and the relative distance between *Alu* and IRF-binding sites on target gene promoters. (e) qRT-PCR showing RNA retrieval upon ChIRP performed in *LEADR* or *LEADR*-Δ*Alu* knocked-in DU145 cells, using probes complementary to *LEADR* or to *lacZ*. Mean + s.d. (n=3 qRT-PCR measurements for each experimental condition) plotted. (f) ChIRP-qPCR detection of *LEADR* occupancy on representative target loci (normalized to unrelated genomic region) in *LEADR* or *LEADR*-Δ*Alu* knocked-in DU145 cells. Line at mean plotted (n=2). (g)

Histone modifications found in promoters of selected '*LEADR*-signature' genes, as from GSE63094 ChIP-Seq data on RWPE-1 cells, viewed on UCSC Genome Browser. \*  $p < 0.05$ ; \*\*  $p < 0.01$  (Student's t-test). Source data are provided as a Source Data file, together with n of all experiments.

**Fig. 5c**

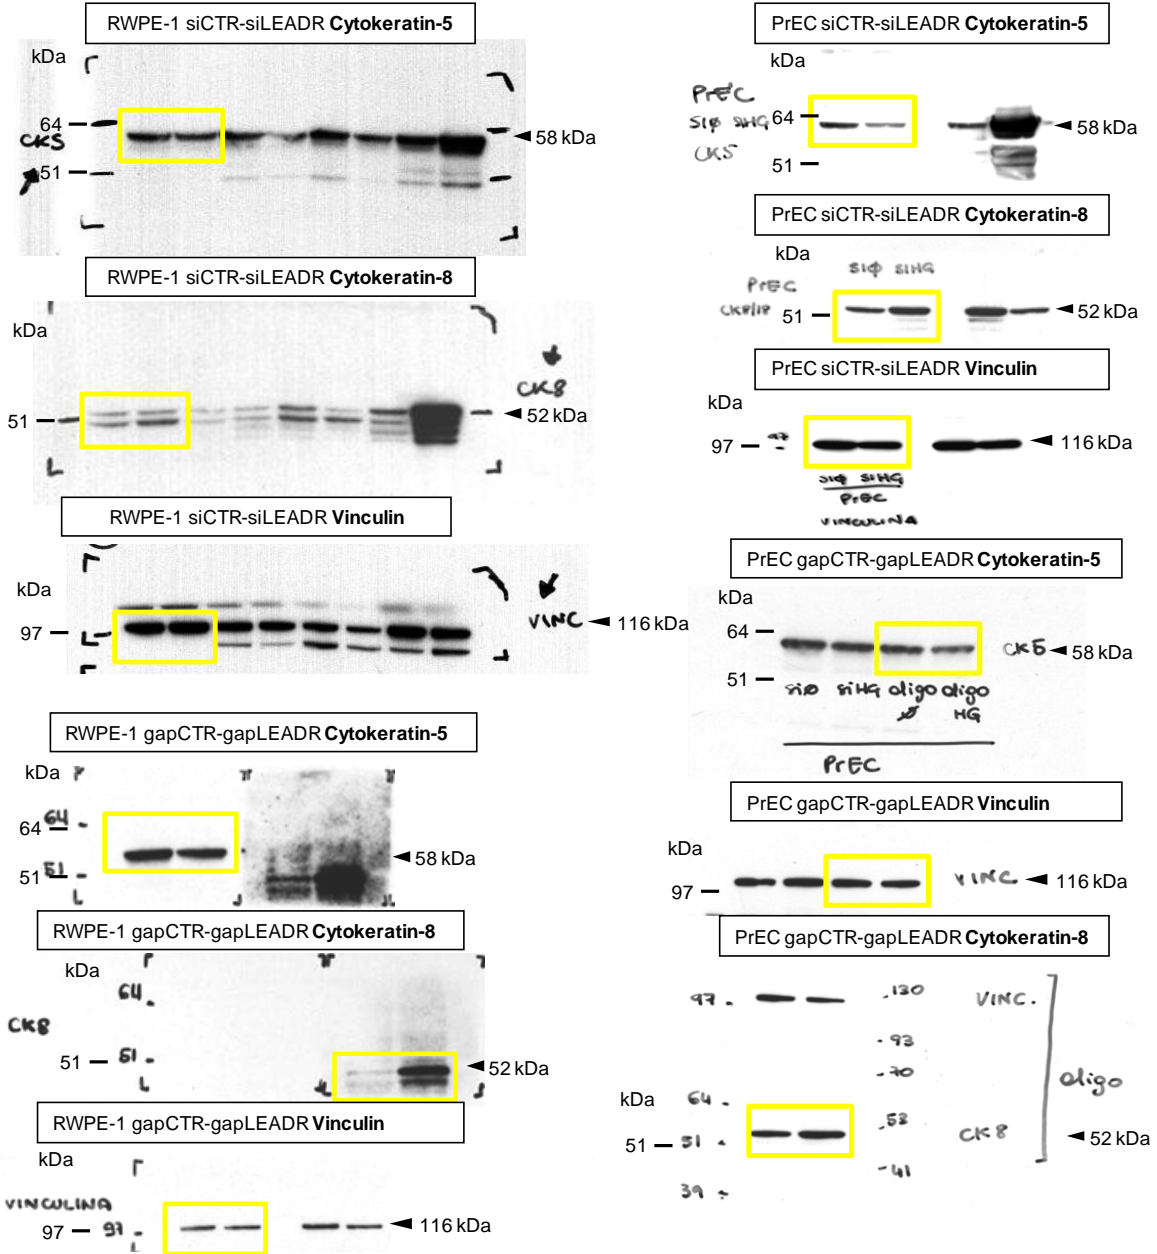

**Fig. 5e**

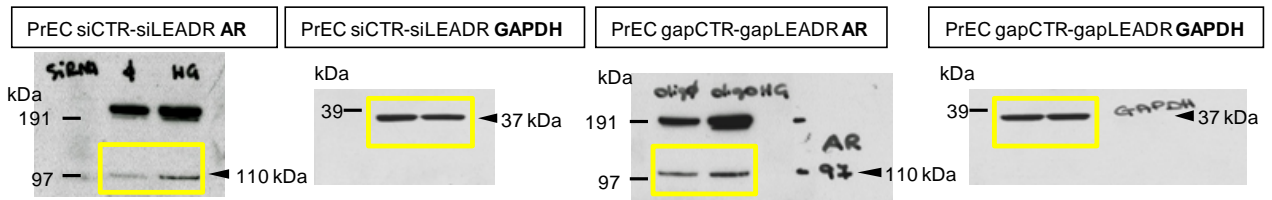

**Fig. 6g**

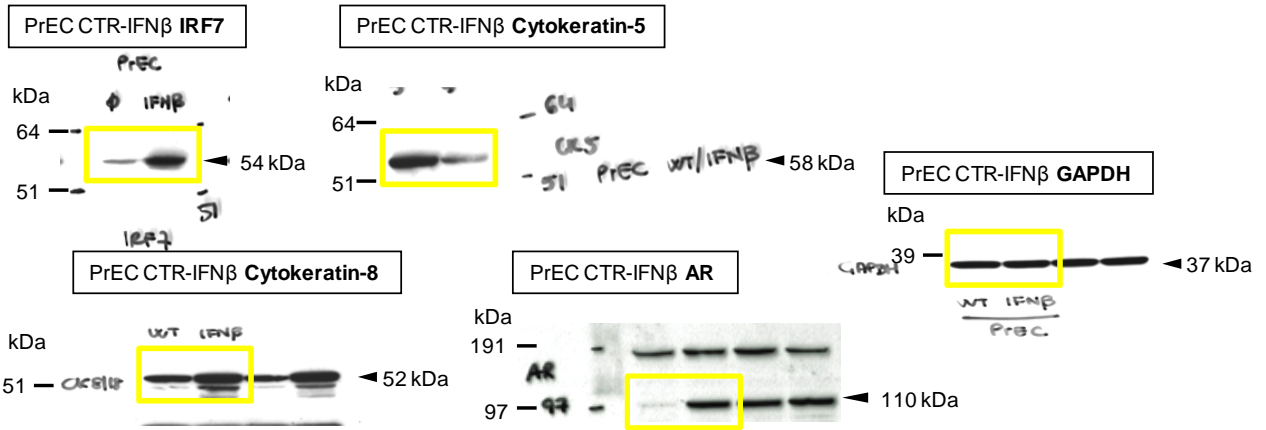

**Fig. 6j**

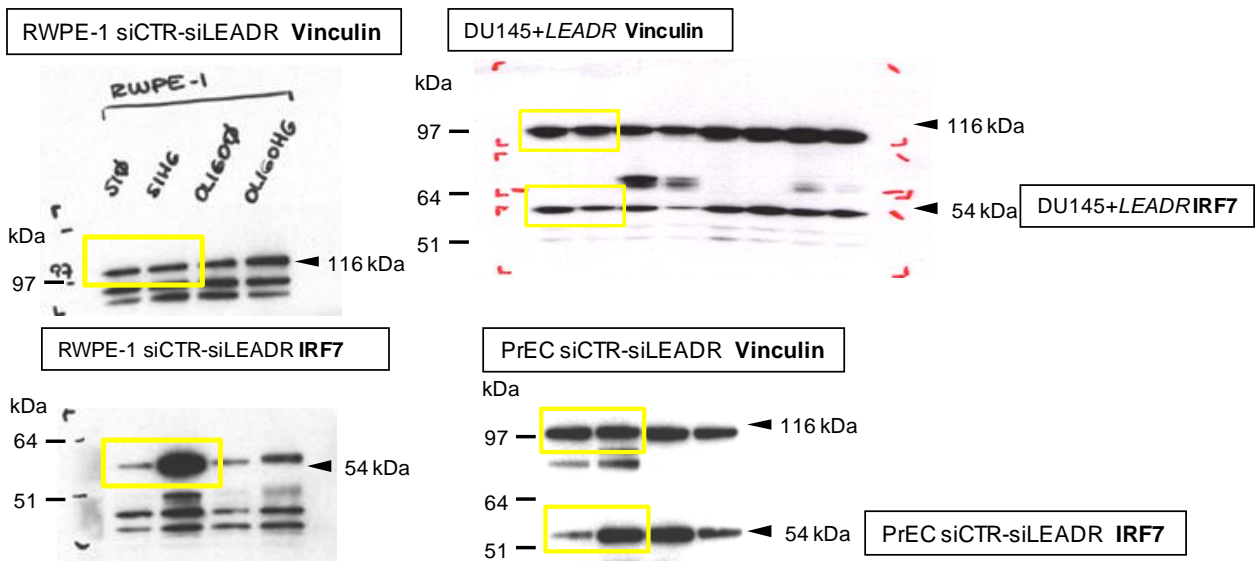

**Fig. 9c**

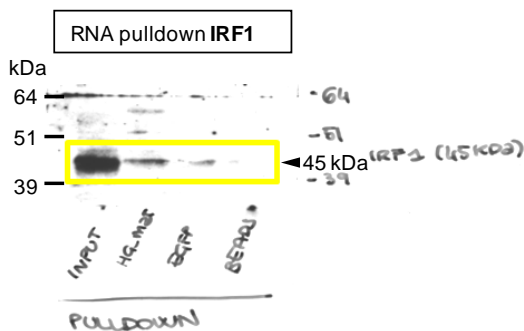

**Supplementary Fig. 4e**

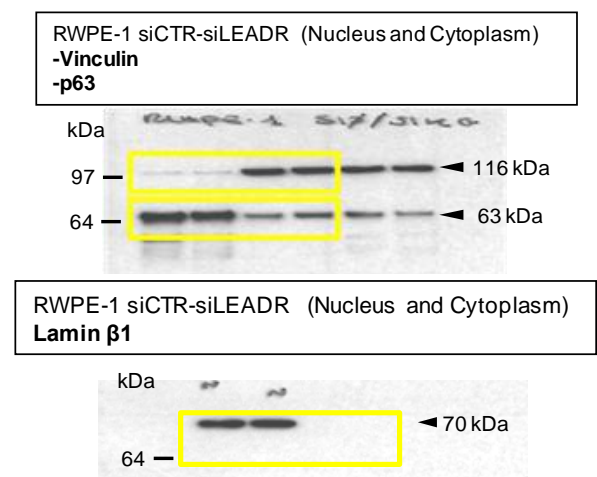

**Supplementary Figure 7. Uncropped blots.** Uncropped images of all blots shown in main and supplementary figures. Molecular weight markers are indicated on the left side of each blot, whereas predicted molecular weight of the protein of interest indicated by an arrow on the right.

**Supplementary Table 1. CPAT analysis on *bona fide* LEADR/MIR205HG transcripts.**

| transcript | RNA size | ORF size | Ficket score | hexamer score | coding probability | coding label |
|------------|----------|----------|--------------|---------------|--------------------|--------------|
| 7062       | 1074     | 213      | 0.537        | -0.07616      | 0.009241           | no           |
| 7057       | 918      | 333      | 1.0013       | 0.032806      | 0.233312           | no           |
| 7063       | 983      | 213      | 0.537        | -0.07616      | 0.009292           | no           |
| 7059       | 1096     | 237      | 0.5842       | -0.07618      | 0.013809           | no           |
| 7064       | 1007     | 237      | 0.5842       | -0.07618      | 0.013883           | no           |
| 7065       | 912      | 237      | 0.5842       | -0.07618      | 0.013962           | no           |
| 7056       | 757      | 213      | 0.537        | -0.07616      | 0.009419           | no           |
| 7061       | 703      | 312      | 0.4714       | -0.18602      | 0.010842           | no           |
| 7054       | 851      | 213      | 0.537        | -0.07616      | 0.009366           | no           |

**Supplementary Table 2. Sequences of siRNAs and gapmers**

| <b>siRNAs</b> | <b>Sequence 5'-3'</b>        |
|---------------|------------------------------|
| siCTR         | 5'-GCAUACAAUGGAGUUGUUA-3'    |
| siLEADR       | 5'-AACUGGGUGCUUUAUAUAGGA-3'  |
| siTP63        | 5'-ACAAUUUCAUGUGUAAACAGCA-3' |
| siDROSHA1     | 5'-AACGAGUAGGCUUCGUGACUU-3'  |
| siDROSHA2     | 5'-AAGGACCAAGUAUUCAGCAAG-3'  |

  

| <b>gapmers</b>                  | <b>Sequence 5'-3'</b>       |
|---------------------------------|-----------------------------|
| gapCTR                          | 5'-TTAACAACTCCATTGTATGC-3'  |
| <i>Intronic gapmers</i>         |                             |
| gapINT1                         | 5'-GAATATGGCATTTTCCAGTC-3'  |
| gapINT2                         | 5'-CAGTCTGTTGGCTGTAATAA-3'  |
| <i>Exon 2-3 junction gapmer</i> |                             |
| gapLEADR                        | 5'-ATGACAGTGTCTATATAAAGC-3' |

### Supplementary Table 3. Guide RNAs and primers used for CRISPR/Cas9 editing

#### Guide RNAs used for CRISPR/Cas9 editing

**Guide\_RNA\_1 (g1)** 5'-CGATTAGGTAGGTCTCTGGG-3'

**Guide\_RNA\_2 (g2)** 5'-GCCCAGAAGGCTAGATGCGT-3'

#### Primers used for genotyping

|             |                            | <i>Expected amplicon</i>            |
|-------------|----------------------------|-------------------------------------|
| <i>g1-F</i> | 5'-CAAGGGGAGCAGCAGACTTA-3' | wt: 3010 bp - del 499 bp            |
| <i>g2-R</i> | 5'-GAAATGCCCATCAACCCTTT-3' |                                     |
| <i>g1-F</i> | 5'-CAAGGGGAGCAGCAGACTTA-3' | wt: 600 bp - del: no amplification  |
| <i>g1-R</i> | 5'-GGTGAGCAAGAGGGACTCAG-3' |                                     |
| <i>g2-F</i> | 5'-GATCTCTGCCTGCCAACAAG-3' | wt: 384 bp - del : no amplification |
| <i>g2-R</i> | 5'-GAAATGCCCATCAACCCTTT-3' |                                     |



**Supplementary Table 4. TaqMan Assays**

| <b>Gene</b>        | <b>Assay</b>         |
|--------------------|----------------------|
| <i>MIR205HG*</i>   | <i>Hs03405498_m1</i> |
| <i>pre-miR-205</i> | <i>Hs04231469_s1</i> |
| <i>KRT5</i>        | <i>Hs00361185_m1</i> |
| <i>KRT14</i>       | <i>Hs00265033_m1</i> |
| <i>KRT8</i>        | <i>Hs01595539_m1</i> |
| <i>KRT18</i>       | <i>Hs02827483_g1</i> |
| <i>IRF7</i>        | <i>Hs01014809_g1</i> |
| <i>DROSHA</i>      | <i>Hs00203008_m1</i> |
| <i>MALAT1</i>      | <i>Hs00273907_s1</i> |
| <i>SNORA74A</i>    | <i>Hs03298571_s1</i> |
| <i>GAPDH</i>       | <i>PN4326317E</i>    |
| <i>CCL5</i>        | <i>Hs00982282_m1</i> |
| <i>MX1</i>         | <i>Hs00895608_m1</i> |
| <i>IFI6</i>        | <i>Hs00242571_m1</i> |
| <i>IFIH1</i>       | <i>Hs00223420_m1</i> |
| <i>PARP10</i>      | <i>Hs00361105_m1</i> |
| <i>IFI27</i>       | <i>Hs01086373_g1</i> |
| <i>OAS2</i>        | <i>Hs00942643_m1</i> |
| <i>HELZ2</i>       | <i>Hs00375688_m1</i> |
| <i>ISG15</i>       | <i>Hs01921425_s1</i> |
| <i>OAS3</i>        | <i>Hs00196324_m1</i> |
| <i>IFIT2</i>       | <i>Hs01922738_s1</i> |
| <i>OASL</i>        | <i>Hs00984387_m1</i> |
| <i>SAMD9</i>       | <i>Hs00539471_s1</i> |
| <i>PARP9</i>       | <i>Hs00967084_m1</i> |
| <i>AR</i>          | <i>Hs00907244_m1</i> |

| <b>microRNA</b>     | <b>Assay</b>                 |
|---------------------|------------------------------|
| <i>hsa-miR-205</i>  | TaqMan microRNA assay 000509 |
| <i>hsa-miR-200b</i> | TaqMan microRNA assay 002274 |
| <i>hsa-miR-200c</i> | TaqMan microRNA assay 2300   |
| <i>hsa-miR-26b</i>  | TaqMan microRNA assay 000407 |
| <i>hsa-miR-877</i>  | TaqMan microRNA assay 241029 |
| <i>RNU48</i>        | TaqMan microRNA assay 001006 |

\*alias *LEADR*: assay covering exon2-exon3 boundary.

**Supplementary Table 5. Primers for end-point RT-PCR and for Sybr green qPCR**

**Primers for end-point RT-PCR**

| Gene                     | Forward                    | Reverse                    |
|--------------------------|----------------------------|----------------------------|
| <i>miR-205</i> byproduct | 5'-CGAGCTCAGTTATGGCACAC-3' | 5'-GGGAGTCTAAGGGCAGCAG-3'  |
| <i>ACTIN</i>             | 5'-CAACGGCTCCGGCATGTG-3'   | 5'-CTCCTTAATGTCACGCACGA-3' |

**Primers for Sybr green qPCR (used for ChIP and ChIRP)**

| Gene                         | Forward                       | Reverse                         |
|------------------------------|-------------------------------|---------------------------------|
| <i>IFI27</i>                 | 5'-GTGGCCCATGTGATAAGCTG-3'    | 5'-CAAGGCTTTAATGGGAGGGC-3'      |
| <i>IFIT3</i>                 | 5'-CTGATGCGTGCCCTACTCT-3'     | 5'-ATGACTGCCCTCTGTGTCTC-3'      |
| <i>IRF7</i>                  | 5'-AGTAGGGAGGAGTGGAGGG-3'     | 5'-GTCCACCTCCCATTACCCAC-3'      |
| <i>ISG15</i>                 | 5'-GAGGCTGAGGTG AGA GGA TC-3' | 5'-GGT CTC TCA CTC TGT CGC C-3' |
| <i>ISG20</i>                 | 5'-CTTCCAGCATCAGTAGTGGC-3'    | 5'-ACTACCCATCCCCGCTTCAG-3'      |
| <i>CCL5</i>                  | 5'-CACAAGAGGAAACCAAGGCC-3'    | 5'-GAAGTGGGAGTGAGGGCAA-3'       |
| <i>OAS2</i>                  | 5'-CATGTGATTGTGGAGGCTGG-3'    | 5'-CAAGGAAGAGGGAATTTCGGC-3'     |
| <i>OAS3</i>                  | 5'-GTTGGGAGGAGTCAGTGAGAG-3'   | 5'-GAGAAGTCCTACCTCGCTGTC-3'     |
| <b>control region 12700F</b> | 5'-GCCTGAGTTACCACACCCAGT-3'   | 5'-TCAGCCACTGTGAAAAGCAG-3'      |

**Supplementary Table 6. Probes used in ChIRP experiments**

| <b>Probe name</b> | <b>Sequence</b>             |
|-------------------|-----------------------------|
| <b>LEADR1</b>     | 5'-GGTGAGCAAGAGGGACTCAG-3'  |
| <b>LEADR2</b>     | 5'-AAACTGGTTTTTCCAAGTCA-3'  |
| <b>LEADR3</b>     | 5'-GTATGGTTGAGAATTGAGCT-3'  |
| <b>LEADR4</b>     | 5'-CGGTCCTGAATAGTTGATTT-3'  |
| <b>LEADR5</b>     | 5'-ACTCCTGAGGAAAGGTGGGG-3'  |
| <b>LEADR6</b>     | 5'-AGGCCTGTGCGGAACAGAAA-3'  |
| <b>LEADR7</b>     | 5'-CCTATATAAAGCACCCAGTT-3'  |
| <b>LEADR8</b>     | 5'-CTCCAAGATGGGTACTTGAG-3'  |
| <b>LEADR9</b>     | 5'-ACGCAAATTTTCATAGCATC-3'  |
| <b>LEADR10</b>    | 5'-TTACAAGTTACAGAAAACGC-3'  |
| <b>LacZ1</b>      | 5'-CCAGTGAATCCGTAATCATG-3'  |
| <b>LacZ2</b>      | 5'-TCACGACGTTGTAAAACGAC-3'  |
| <b>LacZ3</b>      | 5'-GCTGATTTGTGTAGTCGGTT-3'  |
| <b>LacZ4</b>      | 5'-TTAAAGCGAGTGGCAAGATG-3'  |
| <b>LacZ5</b>      | 5'-AGACGATTCATTGGCACCAT-3'  |
| <b>LacZ6</b>      | 5'-TGATCACACTCGGGTGATTA-3'  |
| <b>LacZ7</b>      | 5'-TTTACCTTGTGGAGCGACAT-3'  |
| <b>LacZ8</b>      | 5'-G TTCAGGCAGTTCAATCAAC-3' |
| <b>LacZ9</b>      | 5'-AGTTTTCTTGCGGCCCTAAT-3'  |
| <b>LacZ10</b>     | 5'-ATGTCTGACAATGGCAGATC-3'  |

### Supplementary Table 7. Site directed mutagenesis primers

#### Sequence

|                        |                                                     |
|------------------------|-----------------------------------------------------|
| $\Delta$ ALU_SENSE     | 5'-CTCACTGCAGCCTCAACCTCCCAGACCGCATCCGGCCTCATGTTC-3' |
| $\Delta$ ALU_ANTISENSE | 5'-GAACATGAGGCCGGATGCGGTCTGGGAGGTTGAGGCTGCAGTGAG-3' |
